# Supplementary material
Source: PubMed Central journal article supplement (PMC2711353)
Supplement: mmc1.pdf [file mmc1.pdf]

Biophysical Journal, Volume 97

**Supporting Material**

**Alternating-Site Mechanism of Kinesin-1 Characterized by Single-Molecule FRET Using  
Fluorescent ATP Analogues**

Sander Verbrugge, Bettina Lechner, Günther Woehlke, and Erwin J. G. Peterman

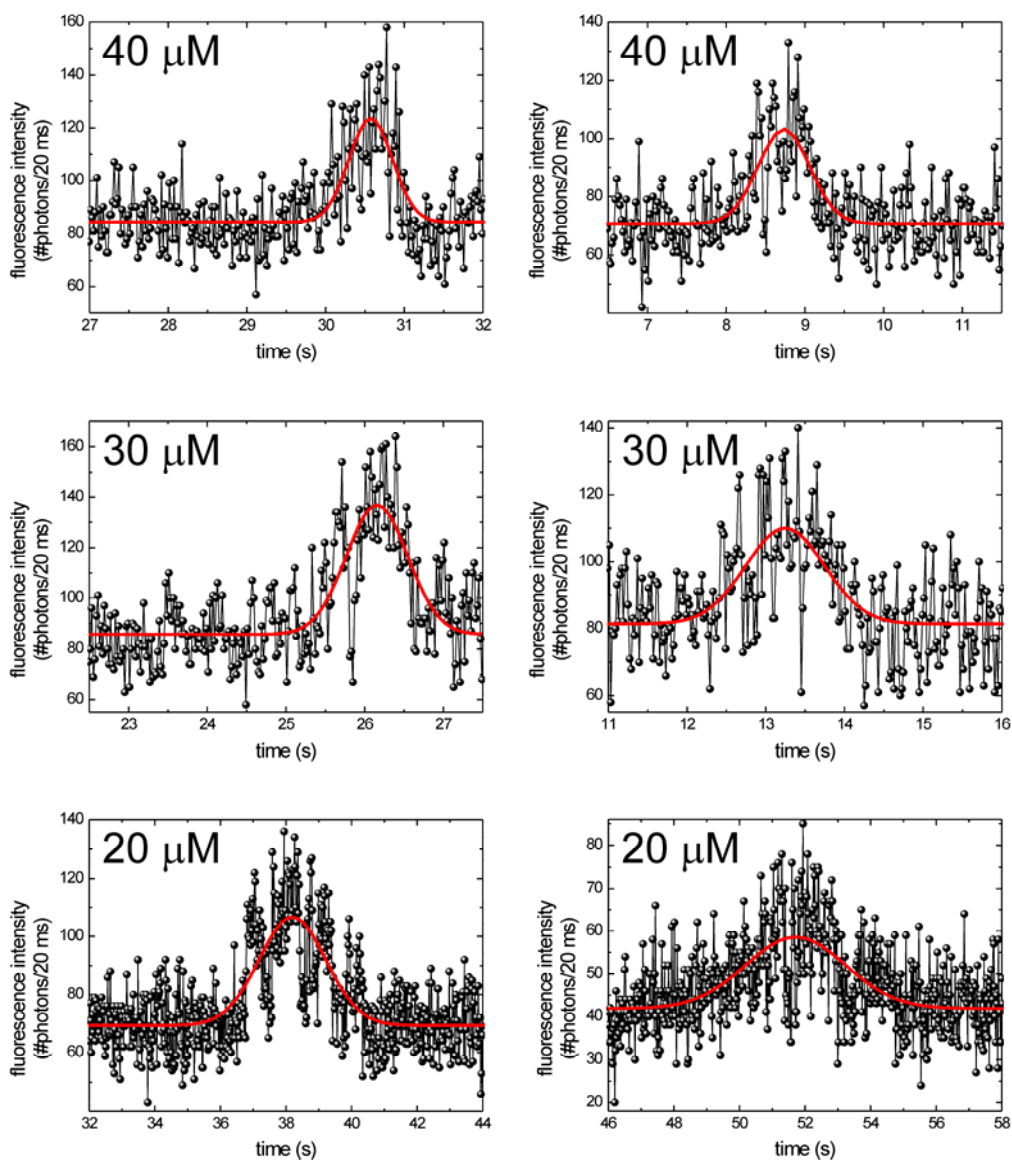

**Supplemental figure 1.** Time traces of the donor fluorescence intensity of single-labelled kinesins walking through the confocal spot, in the presence of 20, 30 or 40 μM fluorescent ATP. Solid red lines represent Gaussian fits.
